# Supplementary material for: Rationale and protocol for the efficacy, safety and tolerability of nangibotide in patients with septic shock (ASTONISH) phase IIb randomised controlled trial
Source: PubMed Central journal article supplement — BMJ Open. 2021 Jul 7;11(7):e042921. doi: 10.1136/bmjopen-2020-042921 (PMC8264912; doi:10.1136/bmjopen-2020-042921), 2021-07-07
Supplement: bmjopen-2020-042921supp001.pdf [file bmjopen-2020-042921supp001.pdf]

**Efficacy, Safety and Tolerability of Nangibotide in Patients with Septic Shock.**  
**A Randomized, Double-blind, Placebo Controlled Dose Selection Study**  
**The ASTONISH Study (MOT-C-203)**

**Table 1: Study Schedule**

| Assessment / Study Day <sup>1</sup>          | SCR             |                    |                 |                 |                 |                 |                 |   |   | EoS             | FU unblinded <sup>2</sup> |           |            |
|----------------------------------------------|-----------------|--------------------|-----------------|-----------------|-----------------|-----------------|-----------------|---|---|-----------------|---------------------------|-----------|------------|
|                                              | ≤24H            | 0                  | 1               | 2               | 3               | 4               | 5               | 6 | 7 | 28<br>+4d       | 90<br>±4d                 | 6m<br>±1w | 12m<br>±1w |
| Informed consent                             | X <sup>11</sup> |                    |                 |                 |                 |                 |                 |   |   |                 |                           |           |            |
| Inclusion/exclusion criteria                 | X               |                    |                 |                 |                 |                 |                 |   |   |                 |                           |           |            |
| Medical history and demographics             | X               |                    |                 |                 |                 |                 |                 |   |   |                 |                           |           |            |
| Previous therapies <sup>3</sup>              | X               |                    |                 |                 |                 |                 |                 |   |   |                 |                           |           |            |
| APACHE II Score                              | X               |                    |                 |                 |                 |                 |                 |   |   |                 |                           |           |            |
| Pregnancy test <sup>4</sup>                  | X               |                    |                 |                 |                 |                 |                 |   |   |                 |                           |           |            |
| Height and weight <sup>5</sup>               | X               |                    |                 |                 |                 |                 |                 |   |   |                 |                           |           |            |
| Physical Examination                         | X               |                    |                 |                 |                 |                 |                 |   |   | X <sup>14</sup> |                           |           |            |
| Vital Signs                                  | X               | X <sup>12</sup>    | X               | X               | X               | X               | X               |   |   | X               |                           |           |            |
| ECG                                          | X               | X <sup>12,15</sup> | X <sup>13</sup> |   |   | X               |                           |           |            |
| Organ dysfunction / SOFA Score <sup>6</sup>  | X               | X <sup>12</sup>    | X               | X               | X               | X               | X               | X | X |                 |                           |           |            |
| Charlson Comorbidity Index CCI)              | X               |                    |                 |                 |                 |                 |                 |   |   |                 |                           |           |            |
| Call to the CCC                              | X               |                    |                 |                 |                 |                 |                 |   |   |                 |                           |           |            |
| Randomization                                | X               |                    |                 |                 |                 |                 |                 |   |   |                 |                           |           |            |
| Study Drug Infusion <sup>7</sup>             |                 | X                  | X               | X               | X               | X               | X               |   |   |                 |                           |           |            |
| Prior and concomitant Therapies              | X               | X                  | X               | X               | X               | X               | X               | X | X | X               |                           |           |            |
| Vasopressor                                  | X               | X                  | X               | X               | X               | X               | X               | X | X | X               |                           |           |            |
| IMV                                          | X               | X                  | X               | X               | X               | X               | X               | X | X | X               |                           |           |            |
| RRT                                          | X               | X                  | X               | X               | X               | X               | X               | X | X | X               |                           |           |            |
| Mortality                                    |                 | X                  | X               | X               | X               | X               | X               | X | X | X               | X                         | X         | X          |
| Adverse Events <sup>16</sup>                 | X               | X                  | X               | X               | X               | X               | X               | X | X | X               |                           |           |            |
| Clinical Laboratory (see table 2)            | X               | X <sup>12</sup>    | X               | X               | X               | X               | X               | X | X | X               |                           |           |            |
| Anti-drug antibodies (ADA)                   |                 | X <sup>12</sup>    |                 |                 |                 |                 |                 |   |   | X               |                           |           |            |
| PK <sup>17</sup>                             |                 | X <sup>12</sup>    | X <sup>13</sup> |   |   |                 |                           |           |            |
| Biomarker samples (see table 2)              |                 | X <sup>12</sup>    | X               | X               | X               | X               | X               | X | X | X               |                           |           |            |
| EuroQol (EQ 5D)                              |                 |                    |                 |                 |                 |                 |                 |   |   | X               | X                         | X         | X          |
| Healthcare resource utilization <sup>8</sup> |                 |                    |                 |                 |                 |                 |                 |   |   | X               | X                         | X         | X          |
| Secondary infections <sup>9</sup>            |                 |                    |                 |                 |                 |                 |                 |   |   | X               |                           |           |            |
| Discharge letter collection <sup>10</sup>    |                 |                    |                 |                 |                 |                 |                 |   |   | X               |                           |           |            |

SCR: screening; EoS: end of study; FU: Follow-up; CCC: Clinical coordination center; d: day; w: week; m: month



- 1: Study days refer to calendar days, day 0 is defined as the calendar day of first study drug administration
- 2: By phone only
- 3: All medication taken within the last 24 hours before start of treatment should be documented
- 4: Women of childbearing potential
- 5: Estimate in case measurement is not feasible
- 6: Daily up to day 7, even in case of intensive care unit (ICU) discharge
- 7: Patients will be treated for at least 3 days (72  $\pm$ 2 hours) with study drug. After the first 3 days of treatment, patients still requiring vasopressor will be treated until 24 ( $\pm$ 2) hours after vasopressor withdrawal with a maximum treatment duration of 5 days (120  $\pm$ 2 hours)
- 8: Day 28 completed at site (including duration of hospitalization and ICU stay, discharge location); 90 days, 6 and 12 months via phone call
- 9: Day 28 completed by site
- 10: Discharge letters from ICU discharge, hospital discharge and for every hospitalization starting before day 28 (where permissible)
- 11: In case of emergency consent, confirmation of consent as soon as patient is capable
- 12: Before first treatment administration
- 13: Daily until end of infusion
- 14: Brief physical examination
- 15: In triplicate, at least 1 minute apart
- 16: AEs will be collected until day28 as specified in section
- 17: For sites where it is not technically feasible, the collection of PK samples may be waived by the sponsor
